# Supplementary material for: Clinical characteristics and Aetiology of Uveitis in a Viral Haemorrhagic Fever Zone
Source: Research Square preprint supplement (doi:10.21203/rs.3.rs-3222203/v1), 2023-08-08
Supplement: Supplementary file 1 [file b274aa8d24b0a240f4ae3552.xlsx]

## Sheet: Sheet1
Table 1. Summary, Demographic and Clinical Characteristics of Recruited EMERGE Patients
Characteristics	Patients, n (%)
Study Patients
Total Recruited	132
Excluded	4
No uveitis	1
Missing data	3
Total Included in Analysis	128
Demographics
Mean Age, years, (range)	36 (5, 75)
Male Gender, n (%)	63 (50)
Uveitis Risk Factors
HIV Positive	9 (7)
Past Ebola Infection	2 (2)
Associated Trauma	48 (38)
Clinical classification
Bilateral	40 (31)
Unilateral	88 (69)
Total Eyes Affected by Uveitis	168
Active	75 (59)
Inactive	53 (41)
Total	128
Ocular Clinical Findings
Cataract	51 (30)
Glaucoma	34 (20)
Retinal Detachments	23 (14)
Epiretinal Membrane	5 (3)
Optic nerve damage	3 (2)
Scleritis	0
Band Keratopathy	0
Total Eyes	168
Retinal Detachments
Rhegmatogenous	3
Serous	5
Undifferentiated	13
No fundal view, B scan not confirmed	2
Total Eyes	23
Unilateral RD	19
Bilateral RD	2
Total	21
Anatomical Classification
Anterior	24 (19)
Intermediate	8 (6)
Posterior	36 (28)
Panuveitis	51(40)
History of uveitis, anatomical location undetermined	9 (7)
Total	128
Laboratory Aetiology
QuantiFERON-Gold Positive	12 (32)
Total Tested	38
VZV IgM Positive	5 (6)
Total Tested	87
HSV IgG Positive	61 (88)
Total Tested	69
VDRL/TPHA Positive	5 (5)
Total Tested	107
Aetiology of Uveitis
Undifferentiated	66 (52)
Toxoplasmosis	46 (36)
Trauma	8 (6)
Syphilis	5 (4)
Ebola	2 (2)
HIV	1 (1)
Total	128
Levels of visual impairment of affected uveitis eyes
Normal <6/12	78 (46)
Mild – visual acuity worse than 6/12 to 6/18	9 (5)
Moderate – visual acuity worse than 6/18 to 6/60	23 (14)
Severe – visual acuity worse than 6/60 to 3/60	3 (2)
Blindness – visual acuity worse than 3/60	55 (33)
Total	168
Mean Adjusted LogMar VA of all affected eyes, n	0.79, 168, 95% CI 0.61, 0.98
Mean LogMar VA of worse affected eye, n	1.14, 128
